# Supplementary material for: Genome-wide identification and expression analysis of new cytokinin metabolic genes in bread wheat (Triticum aestivum L.)
Source: PubMed Central journal article supplement (PMC6360083; doi:10.7717/peerj.6300), 2019-01-31
Supplement: peerj-07-6300-s001.pdf [file peerj-07-6300-s001.pdf]

**Table S1. Primers used in this study.**

| <b>Forward Primer</b> | <b>Sequence</b>         | <b>Reverse Primer</b> | <b>Sequence</b>          |
|-----------------------|-------------------------|-----------------------|--------------------------|
| TaGLU1d-F             | GACCAAGGCGCAGACGTA      | TaGLU1d-R             | GGGAGCTTGCCAGTTGG        |
| TaTaGLU2-F            | GGTTAAACTACTACACCTCACGG | TaGLU2-R              | GCCTCCATGGGTAGAGGTG      |
| TaGLU3-F              | CCATTGTCGGATGTCGATGAA   | TaGLU3-R              | CCTTACCCGCATCCTGTCCG     |
| TaGLU4-F              | GACCCAGGGGCATGGAAC      | TaGLU4-R              | CGTGAACACCGTCAGCGAT      |
| TaGLU5-F              | CGGAGAAAAATATCGAGCTGCC  | TaGLU5-R              | GCTCTAGTATCCATCCGAACAC   |
| TaGLU6-F              | CACCTACTACACCAGGCACA    | TaGLU6-R              | GGCGTCCTTGAGGGCAA        |
| TaGLU7-F              | CGGGAGCAGTACTTGCGG      | TaGLU7-R              | CAGTGTGCAGAAGGTCTCT      |
| TaGLU9-F              | ACCCGCTTACAAATTCCACAG   | TaGLU9-R              | GTCCGTGTTGTAGTCCCGA      |
| TaGLU12-F             | GCTTGAGGAACAGCTACTCTACT | TaGLU12-R             | GCACTCAGCAGGGCATCA       |
| TaGLU13-F             | CGTCAGGTATGTCAATCAGCG   | TaGLU13-R             | CTTTGGAGTCTCTCTTGTGTTTC  |
| TaGLU30-F             | GCCGACGAGACTGCCTTC      | TaGLU30-R             | GATTGCAGGGTTTCCATACTTGAG |
| TaCKX1-F              | GTGGCGCTGGACAAGATC      | TaCKX1-R              | AGAACCCGAGTATCTTCTGGT    |
| TaCKX2-F              | GCTCTATACTACGGCGGCG     | TaCKX2-R              | GCGGGGAGGAAGAGGT         |
| TaCKX3-F              | CCTCTCTGCCTCGTCTCTAG    | TaCKX3-R              | CCAGCCTTCAAGCTCTGC       |
| TaCKX4-F              | CGGCTGAGATACATACAGTCAAC | TaCKX4-R              | CGTCTGTTGTCCACTTTG       |
| TaCKX5-F              | ATTGCCGGTGTACTCGCC      | TaCKX5-R              | CTCCGGTTCTTCGCCTC        |
| TaCKX7-F              | TTCTCGACTTTGACGCTGGG    | TaCKX7-R              | TGTAGAATACGTCCTCGCCAG    |
| TaCKX8-F              | AACGTCCTGCAGCTCCAA      | TaCKX8-R              | CTGCGGATGGAGTGCTCAT      |
| TaCKX9-F              | CATTCAATCCACAGGACCCAGAA | TaCKX9-R              | CTGAGTTGAGATAGTAGTCATGG  |
| TaCKX10-F             | TGAACCGACCCTGACG        | TaCKX10-R             | CTTCTGCTCCTCCTGCC        |
| TaCKX11-F             | GCCCTGTACCAGCACCAC      | TaCKX11-R             | ACAGGAACTCCACGTACCC      |
| TaCisZOG1-F           | GAGAAGGAGATGGAGGAGCG    | TaCisZOG1-R           | GCTGCTTGTCGAGCCAG        |
| TaCisZOG3-F           | GGAGAAGGAGATGGAGGAACA   | TaCisZOG3-R           | GACACGTAGAGCACCGATGA     |
| TaZOG3-F              | CGCAGGTGACCATCCTCT      | TaZOG3-R              | CTCCTCGGGACGTTCTT        |
| TaZOG2-F              | ACCAGCAGCTGGTCTCA       | TaZOG2-R              | TTCACCAGGTCGTTCTCA       |
| TaZOG4-F              | GAGGGCTGGAGAACGC        | TaZOG4-R              | GCACCTCGAACTCCTCCATG     |
| TaIPT1-F              | GGATAAGATCCAGGTGTACGCT  | TaIPT1-R              | GAGGCAGTCATGGGAGGAG      |
| TaIPT2-F              | AACACGTTCCGGCCTCGT      | TaIPT2-R              | CAGATCAGTTGGCAGGGTAGAA   |
| TaIPT3-F              | CTTCTCGCCAAGCGATTT      | TaIPT3-R              | TCAGAGGCCGACGTTGTC       |
| TaIPT6-F              | CGCACC GACTACTCTCGT     | TaIPT6-R              | CCGCTCTTGAGGAACACCT      |
| TaIPT7-F              | CGAGCGGCAATGGCAAAG      | TaIPT7-R              | GTGGCCTGTTGGTGACC        |
| TaIPT8-F              | CTCTGGGTGGACGTGGAG      | TaIPT8-R              | TGCGCCGATCTTGGAC         |
| TaIPT9-F              | TTGCCGCGATTTCCGTGA      | TaIPT9-R              | ACCCACTTCCAACACCATCT     |
| TaIPT10-F             | GTGGAAGAAGCGGTGGAG      | TaIPT10-R             | GCATCATCGCTTGGGAATC      |
