# Supplementary material for: Genome-wide identification and expression analysis of new cytokinin metabolic genes in bread wheat (Triticum aestivum L.)
Source: PubMed Central journal article supplement (PMC6360083; doi:10.7717/peerj.6300), 2019-01-31
Supplement: peerj-07-6300-s002.pdf [file peerj-07-6300-s002.pdf]

## Gene IDs and genomic sequences of TaCKX gene family

| NAME             | GENE ID            |
|------------------|--------------------|
| <i>TaCKX1AA</i>  | TraesCS3A01G109500 |
| <i>TaCKX1BB</i>  | TraesCS3B01G128700 |
| <i>TaCKX1DD</i>  | TraesCS3D01G111300 |
| <i>TaCKX2AA</i>  | TraesCS3A01G311000 |
| <i>TaCKX2BB</i>  | TraesCS3B01G161100 |
| <i>TaCKX2DD</i>  | TraesCS3D01G143600 |
| <i>TaCKX3AA</i>  | TraesCS1A01G159600 |
| <i>TaCKX3BB</i>  | TraesCS1B01G176000 |
| <i>TaCKX3DD</i>  | TraesCS1D01G157000 |
| <i>TaCKX4AA</i>  | TraesCS3A01G481000 |
| <i>TaCKX4BB</i>  | TraesCS3B01G525300 |
| <i>TaCKX4DD</i>  | TraesCS3D01G475800 |
| <i>TaCKX5AA</i>  | TraesCS3A01G321100 |
| <i>TaCKX5BB</i>  | TraesCS3B01G344600 |
| <i>TaCKX5DD</i>  | TraesCS3D01G310200 |
| <i>TaCKX7AA</i>  | TraesCS6A01G185800 |
| <i>TaCKX7BB</i>  | TraesCS6B01G214700 |
| <i>TaCKX7DD</i>  | TraesCS6B01G214700 |
| <i>TaCKX8AA</i>  | TraesCS2A01G378300 |
| <i>TaCKX8BB</i>  | TraesCS2B01G395200 |
| <i>TaCKX8DD</i>  | TraesCS2D01G374600 |
| <i>TaCKX9AA</i>  | TraesCS1A01G234800 |
| <i>TaCKX9BB</i>  | TraesCS1B01G248700 |
| <i>TaCKX9DD</i>  | TraesCS1D01G237200 |
| <i>TaCKX10AA</i> | TraesCS7A01G363400 |
| <i>TaCKX10BB</i> | TraesCS7B01G264400 |
| <i>TaCKX10DD</i> | TraesCS7D01G359700 |
| <i>TaCKX11AA</i> | TraesCS7A01G536900 |
| <i>TaCKX11BB</i> | TraesCS7B01G455000 |
| <i>TaCKX11DD</i> | TraesCSU01G106300  |
| <i>TaCKX12DD</i> | TraesCS3D01G143500 |
| <i>TaCKX13DD</i> | TraesCS3D01G143200 |
| <i>TaCKX14AA</i> | TraesCS3A01G311100 |
| <i>TaCKX14BB</i> | TraesCS3B01G161000 |
| <i>TaCKX14DD</i> | TraesCS3D01G143300 |

## Gene IDs and genomic sequences of TaZOG gene family

| NAME            | GENE ID            |
|-----------------|--------------------|
| <i>TaZOG1AA</i> | TraesCS5A01G444500 |
| <i>TaZOG1BB</i> | TraesCS5B01G528900 |
| <i>TaZOG1DD</i> | TraesCS5D01G527900 |
| <i>TaZOG2AA</i> | TraesCS5A01G553100 |
| <i>TaZOG2BB</i> | TraesCS4B01G388700 |
| <i>TaZOG2DD</i> | TraesCSU01G124500  |
| <i>TaZOG3AA</i> | TraesCS3A01G125500 |
| <i>TaZOG3BB</i> | TraesCS3B01G144600 |
| <i>TaZOG4AA</i> | TraesCS7A01G189500 |
| <i>TaZOG4BB</i> | TraesCS7B01G094400 |

|                    |                    |
|--------------------|--------------------|
| <i>TaZOG4DD</i>    | TraesCS7D01G190600 |
| <i>TacisZOG1AA</i> | TraesCS2A01G410000 |
| <i>TaCisZOG1BB</i> | TraesCS2B01G428300 |
| <i>TaCisZOG1DD</i> | TraesCS2D01G407200 |
| <i>TacisZOG3AA</i> | TraesCS2A01G474700 |
| <i>TaCisZOG3BB</i> | TraesCS2B01G498300 |
| <i>TaCisZOG3DD</i> | TraesCS2D01G475100 |
| <i>TacisZOG4AA</i> | TraesCS7A01G467800 |
| <i>TaCisZOG4BB</i> | TraesCS7B01G369200 |
| <i>TaCisZOG4DD</i> | TraesCS7D01G455200 |

---

**Gene IDs and genomic sequences of TaIPT gene family**

---

| NAME             | GENE ID            |
|------------------|--------------------|
| <i>TaIPT1AA</i>  | TraesCS5A01G181100 |
| <i>TaIPT1BB</i>  | TraesCS5B01G178800 |
| <i>TaIPT1DD</i>  | TraesCS5D01G185500 |
| <i>TaIPT2AA</i>  | TraesCS1A01G057000 |
| <i>TaIPT2BB</i>  | TraesCS1B01G074400 |
| <i>TaIPT2DD</i>  | TraesCS1D01G067500 |
| <i>TaIPT3AA</i>  | TraesCS3A01G263300 |
| <i>TaIPT3BB</i>  | TraesCS3B01G296500 |
| <i>TaIPT3DD</i>  | TraesCS3D01G263000 |
| <i>TaIPT4BB</i>  | TraesCS1B01G323900 |
| <i>TaIPT6AA</i>  | TraesCS5A01G460000 |
| <i>TaIPT6BB</i>  | TraesCS5B01G469600 |
| <i>TaIPT6DD</i>  | TraesCS5D01G471100 |
| <i>TaIPT7AA</i>  | TraesCS3A01G136200 |
| <i>TaIPT7BB</i>  | TraesCS3B01G154100 |
| <i>TaIPT7DD</i>  | TraesCS3D01G137000 |
| <i>TaIPT8AA</i>  | TraesCS1A01G376300 |
| <i>TaIPT8BB</i>  | TraesCS1B01G396700 |
| <i>TaIPT8DD</i>  | TraesCS1D01G383600 |
| <i>TaIPT9AA</i>  | TraesCS2A01G265700 |
| <i>TaIPT9BB</i>  | TraesCS2B01G276300 |
| <i>TaIPT9DD</i>  | TraesCS2D01G258000 |
| <i>TaIPT10AA</i> | TraesCS7A01G560300 |
| <i>TaIPT10BB</i> | TraesCS7B01G486700 |
| <i>TaIPT10DD</i> | TraesCS7D01G549300 |

---

**Gene IDs and genomic sequences of newly identified TaGLU genes**

---

| NAME            | GENE ID            |
|-----------------|--------------------|
| <i>TaGLU5AA</i> | TraesCS3A01G447500 |
| <i>TaGLU5BB</i> | TraesCS3B01G483500 |
| <i>TaGLU5DD</i> | TraesCS3D01G440200 |
| <i>TaGLU6AA</i> | TraesCS4A01G056400 |
| <i>TaGLU6BB</i> | TraesCS4B01G248600 |
| <i>TaGLU6DD</i> | TraesCS4D01G248000 |
| <i>TaGLU7AA</i> | TraesCS4A01G272900 |
| <i>TaGLU7BB</i> | TraesCS4B01G041100 |
| <i>TaGLU7DD</i> | TraesCS4D01G038500 |
| <i>TaGLU8AA</i> | TraesCS4A01G272800 |
| <i>TaGLU8BB</i> | TraesCS4B01G041200 |
| <i>TaGLU8DD</i> | TraesCS4D01G038600 |

|                  |                    |
|------------------|--------------------|
| <i>TaGLU9BB</i>  | TraesCS3B01G368800 |
| <i>TaGLU9DD</i>  | TraesCS3D01G418000 |
| <i>TaGLU11AA</i> | TraesCS3A01G448200 |
| <i>TaGLU11BB</i> | TraesCS3B01G484200 |
| <i>TaGLU11DD</i> | TraesCS3D01G440600 |
| <i>TaGLU12AA</i> | TraesCS2A01G521000 |
| <i>TaGLU12BB</i> | TraesCS2B01G820000 |
| <i>TaGLU12DD</i> | TraesCS2D01G522700 |
| <i>TaGLU13AA</i> | TraesCS2A01G384300 |
| <i>TaGLU13BB</i> | TraesCS2B01G401500 |
| <i>TaGLU13DD</i> | TraesCS2D01G381000 |
| <i>TaGLU14AA</i> | TraesCS2A01G384600 |
| <i>TaGLU14DD</i> | TraesCS2D01G381300 |
| <i>TaGLU15AA</i> | TraesCS2A01G384400 |
| <i>TaGLU15DD</i> | TraesCS2D01G381100 |
| <i>TaGLU16AA</i> | TraesCS2A01G038400 |
| <i>TaGLU16DD</i> | TraesCS2D01G037400 |
| <i>TaGLU17BB</i> | TraesCS3B01G277600 |
| <i>TaGLU19AA</i> | TraesCS3A01G447800 |
| <i>TaGLU19BB</i> | TraesCS3B01G484000 |
| <i>TaGLU19DD</i> | TraesCS3D01G440500 |
| <i>TaGLU21DD</i> | TraesCS5D01G404700 |
| <i>TaGLU22BB</i> | TraesCS3B01G369200 |
| <i>TaGLU22DD</i> | TraesCS3D01G331000 |
| <i>TaGLU23AA</i> | TraesCS1A01G229300 |
| <i>TaGLU23BB</i> | TraesCS1B01G244800 |
| <i>TaGLU23DD</i> | TraesCS1D01G232700 |
| <i>TaGLU24AA</i> | TraesCS7A01G227300 |
| <i>TaGLU24BB</i> | TraesCS7B01G192200 |
| <i>TaGLU24DD</i> | TraesCS7D01G227100 |
| <i>TaGLU26AA</i> | TraesCS3A01G003900 |
| <i>TaGLU26BB</i> | TraesCS3B01G006000 |
| <i>TaGLU26DD</i> | TraesCS3D01G006900 |
| <i>TaGLU28AA</i> | TraesCS7A01G246300 |
| <i>TaGLU28BB</i> | TraesCS7B01G145100 |
| <i>TaGLU28DD</i> | TraesCS7D01G245000 |
| <i>TaGLU30AA</i> | TraesCS5A01G265800 |
| <i>TaGLU30BB</i> | TraesCS5B01G265500 |
| <i>TaGLU30DD</i> | TraesCS5D01G273700 |
| <i>TaGLU31AA</i> | TraesCS3A01G216000 |
| <i>TaGLU31BB</i> | TraesCS3B01G195600 |
| <i>TaGLU31DD</i> | TraesCS3D01G171000 |
| <i>TaGLU32AA</i> | TraesCS5A01G295100 |
| <i>TaGLU32BB</i> | TraesCS5B01G294400 |
| <i>TaGLU32DD</i> | TraesCS5D01G302600 |
| <i>TaGLU34BB</i> | TraesCS7B01G267800 |
| <i>TaGLU34DD</i> | TraesCS7D01G363100 |
| <i>TaGLU35AA</i> | TraesCS3A01G175800 |
| <i>TaGLU35BB</i> | TraesCS3B01G205500 |
| <i>TaGLU35DD</i> | TraesCS3D01G181400 |
| <i>TaGLU38AA</i> | TraesCS7A01G386200 |
| <i>TaGLU38BB</i> | TraesCS7B01G289100 |
| <i>TaGLU38DD</i> | TraesCS4D01G085600 |

---
